# Supplementary material
Source: ML conference proceedings conference paper supplement (https://openaccess.thecvf.com/content/WACV2023/html/Ni_Cross-Identity_Video_Motion_WACV_2023_paper.html)
Supplement: Supplementary file 2 [file Ni_Cross-Identity_Video_Motion_WACV_2023_supplemental.zip]

# Supplementary Materials for Cross-identity Video Motion Retargeting with Joint Transformation and Synthesis

Haomiao Ni<sup>1</sup>

Yihao Liu<sup>2</sup>

Sharon X. Huang<sup>1</sup>

Yuan Xue<sup>2</sup>

<sup>1</sup>The Pennsylvania State University, University Park, PA, USA

<sup>2</sup>Johns Hopkins University, Baltimore, MD, USA

<sup>1</sup>{hfn5052, suh972}@psu.edu    <sup>2</sup>{yliu236, yuanxue}@jhu.edu

We submit 4 videos as supplementary materials. Each video contains 4 independent examples. The first column shows subject video clips, the second column shows driving video clips and the last column shows the video clips generated by our proposed TS-Net.
