# Supplementary material
Source: ML conference proceedings conference paper supplement (https://openaccess.thecvf.com/content/WACV2023/html/Ni_Cross-Identity_Video_Motion_WACV_2023_paper.html)
Supplement: Supplementary file 3 [file Ni_Cross-Identity_Video_Motion_WACV_2023_supplemental.zip]

Archive with 11 entries (10 files):
- 0729-supp/
- 0729-supp/face2.mp4
- __MACOSX/0729-supp/._face2.mp4
- 0729-supp/face1.mp4
- __MACOSX/0729-supp/._face1.mp4
- 0729-supp/0729-supp.pdf
- __MACOSX/0729-supp/._0729-supp.pdf
- 0729-supp/pose2.mp4
- __MACOSX/0729-supp/._pose2.mp4
- 0729-supp/pose1.mp4
- __MACOSX/0729-supp/._pose1.mp4
